# Supplementary material
Source: HighWire-hosted journal article supplement (https://bmjopenquality.bmj.com/highwire/filestream/146445/field_highwire_adjunct_files/0/bmjoq-2023-002307supp001_data_supplement.pdf)
Supplement: bmjoq-2023-002307supp001_data_supplement.pdf [file bmjoq-2023-002307supp001_data_supplement.pdf]

# Fish bone analysis

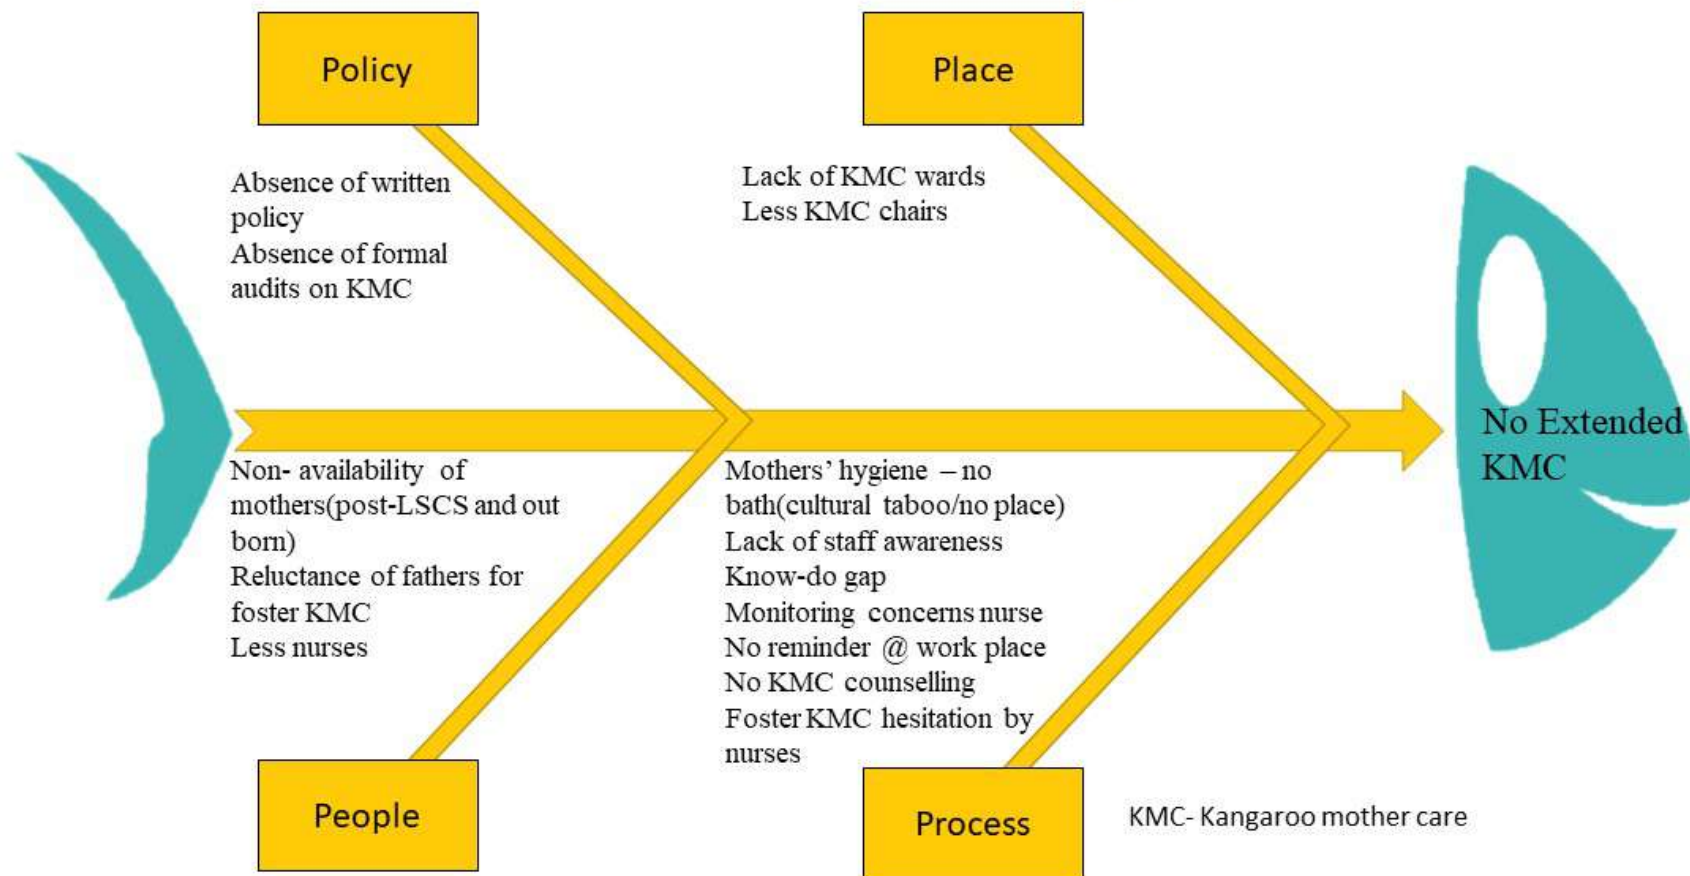

Summary Table: Summary of interventions

| Quality indicators                                                                                                                 | I | II | III     | IV | V | VI |
|------------------------------------------------------------------------------------------------------------------------------------|---|----|---------|----|---|----|
| <b>Implementation phase</b>                                                                                                        |   |    |         |    |   |    |
| Awareness of healthcare staff through virtual/in-person CME                                                                        | ✓ | ✓  | Led CME | ✓  | ✓ | ✓  |
| Available mothers-sponging should be sufficient instead of bath                                                                    | ✓ | ✓  | ✓       |    |   |    |
| Provision of KMC chairs                                                                                                            | ✓ |    |         |    | ✓ |    |
| Foster KMC motivation                                                                                                              | ✓ | ✓  | ✓       | ✓  | ✓ | ✓  |
| Removal of restrictions on visiting hours for parents (Policy).                                                                    | ✓ | ✓  | ✓       | ✓  | ✓ | ✓  |
| Prescribing KMC in routine treatment chart/including it on the dashboard                                                           | ✓ | ✓  | ✓       | ✓  | ✓ | ✓  |
| Activities involving parental participation i.e., KMC counseling competition, awareness session, success celebration with parents. | ✓ | ✓  | ✓       | ✓  |   | ✓  |
| <b>Sustenance phase</b>                                                                                                            |   |    |         |    |   |    |
| KMC champion/star                                                                                                                  | ✓ | ✓  | ✓       | ✓  |   | ✓  |
| Weekly parental counseling sessions on KMC                                                                                         | ✓ | ✓  |         |    | ✓ |    |
| Assessing knowledge through quiz/MCQ sessions for nurses                                                                           | ✓ | ✓  | ✓       | ✓  | ✓ | ✓  |

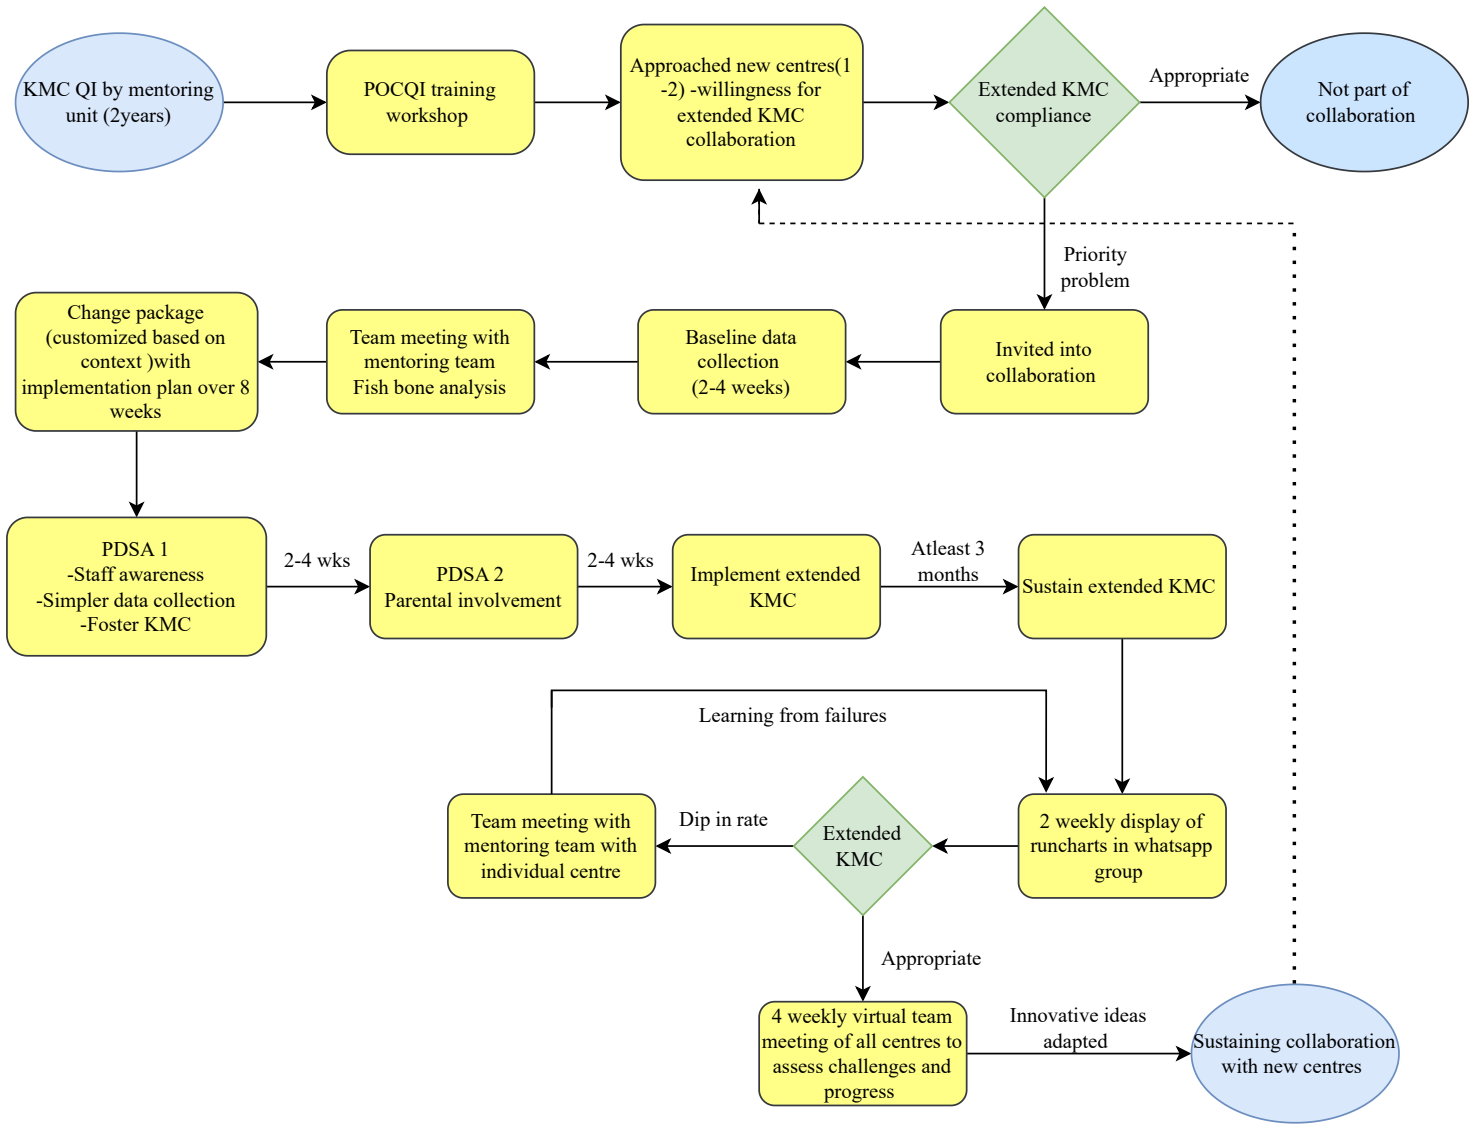

SOP of KMC collaboration

Abbreviations: KMC- Kangaroo mother care, QI- Quality improvement, POCQI- Point of care quality improvement training, PDSA- Plan-Do-Study-Act cycles.
